# Supplementary material
Source: publisher site journal article supplement (https://www.dovepress.com/article/571169)
Supplement: Supplementary file 1 [file Supplementary%20materials%201.1.docx]

**Table S1**. Perioperative outcomes and adjuvant therapy schemes of liver resection (LR) group.

| **Characteristic** | **LR (n = 23)** |
| --- | --- |
| Surgical type (laparoscopic/open) | 6 (26.1)/17 (73.9) |
| Extent of liver resection (major/minor) | 19 (82.6)/4 (17.4) |
| PVTT Management (Thrombectomy/En Bloc Resection) | 6 (26.1)/17 (73.9) |
| Operating time (min) | 270 (220-360) |
| Blood loss (mL) | 400 (200-500) |
| Blood loss (≥ 400 mL/< 400 mL) | 13 (56.5)/10 (43.5) |
| Blood transfusion (yes/no) | 8 (34.8)/15 (65.2) |
| Postoperative complications |  |
| Fever | 1 (4.3) |
| Incision infection | 2 (8.7) |
| Ascites | 9 (39.1) |
| Pleural effusion | 4 (17.4) |
| Biliary leakage | 1 (4.3) |
| Postoperative complications (no/I-II/III-IV) | 6 (26.1)/16 (69.6)/1 (4.3) |
| Postoperative hospital stay (day) | 12 (9-13) |
| Postoperative 90-day mortality | 0 (0) |
| Microvascular invasion (M0/M1/M2) | 3 (13.0)/6 (26.1)14 (60.9) |
| Postoperative adjuvant therapy |  |
| None | 4 (17.4) |
| TKIs | 11 (47.8) |
| PD-1 inhibitors | 1 (4.3) |
| TKIs + PD-1 inhibitors | 3 (13.0) |
| TACE | 4 (17.4) |

TKIs, tyrosine kinase inhibitors; TACE, transarterial chemoembolization.

**Table S2.** Therapy schemes and best tumor response of the targeted therapy (TT) + PD-1 group.

| **Characteristic** | **TT + PD-1 (n = 30)** |
| --- | --- |
| Targeted therapy |  |
| Sorafenib | 2 (6.7) |
| Apatinib | 2 (6.7) |
| Lenvatinib | 23 (76.7) |
| Bevacizumab | 2 (6.7) |
| PD-1 inhibitors |  |
| Sintilimab | 13 (43.3) |
| Camrelizumab | 11 (36.7) |
| Tislelizumab | 3 (10.0) |
| Toripalimab | 3 (10.0) |
| Best tumor response per mRECIST criteria |  |
| Partial response (PR) | 7 (23.3) |
| Stable disease (SD) | 9 (30.0) |
| Progressive disease (PD) | 14 (46.7) |
| Objective response rate (ORR) | 23.3 |
| Disease control rate (DCR) | 53.3 |
| PD-1 inhibitors treatment period (cycle) | 3 (1-8.3) |

**Table S3**. Treatment-related adverse events (TRAEs) of the TT + PD-1 group.

| **TRAEs** | **TT + PD-1 (n = 30)** |
| --- | --- |
| Hypertension | 4 (13.3) |
| Fatigue | 7 (23.3) |
| Loss of appetite | 6 (20.0) |
| Fever | 4 (13.3) |
| Gastrointestinal hemorrhage | 3 (10.0) |
| Diarrhea | 1 (3.3) |
| Hypothyroidism | 1 (3.3) |
| Vomiting | 1 (3.3) |
| Itching | 5 (16.7) |
| Hand-foot syndrome | 3 (10.0) |
| Immune hepatitis | 1 (3.3) |
| Skin rash | 4 (13.3) |
| Hyperbilirubinemia | 8 (26.7) |
| Elevated transaminase | 10 (33.3) |
| Total | 23 (76.7) |
| Grade 1/2 | 21 (70.0) |
| Grade 3/4 | 2 (6.7) |
